# Supplementary material for: Association of early PSMA upregulation with duration of response to enzalutamide with or without [177Lu]Lu-PSMA-617 in poor-risk, metastatic, castration-resistant prostate cancer: Findings from the randomised, phase 2, ENZA-p trial (ANZUP 1901)
Source: Research Square preprint supplement (doi:10.21203/rs.3.rs-6307229/v1), 2025-04-09
Supplement: Supplementary file 1 [file 6a91cfe0f27c05591147dc61.pdf]

**PSMA as a therapeutic agent and imaging biomarker**  
in men with metastatic castration-resistant prostate cancer (mCRPC) treated with enzalutamide

**Why this trial?**

**enzalutamide** is a potent **androgen receptor (AR) inhibitor**.

It improves survival in men with metastatic prostate cancer. However, acquired resistance is common.

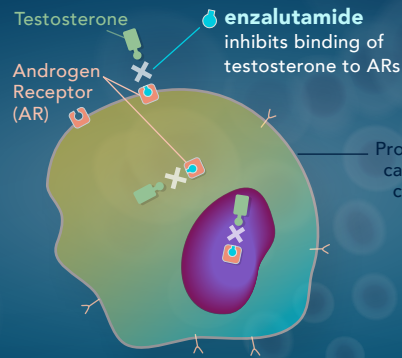

**Prostate specific membrane antigen (PSMA)** are expressed abundantly on the surface of prostate cancer cells.

**Lu-PSMA-617** is a radiolabelled small molecule that delivers  $\beta$  radiation to cells expressing PSMA. it improves overall survival and is well tolerated in men with CRPC who have progressed despite chemotherapy.

- Androgen resistant cells upregulate PSMA expression with androgen blockade, and
- reduced PSMA expression following Lu-PSMA-617 may improve sensitivity to AR blockade.

**Hypothesis**

Simultaneously targeting the PSMA and androgen receptors will lead to an improved treatment response, extending the time men benefit from treatment.

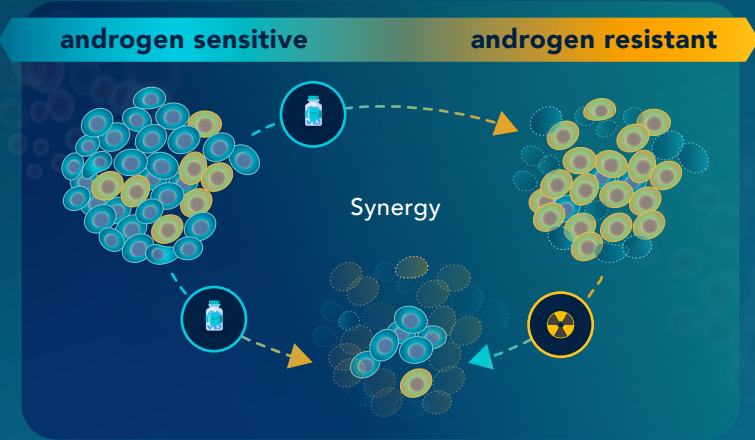

**Objectives**

- Determine if the addition of adaptive doses of **Lu PSMA** to standard **enzalutamide** effectively addresses treatment resistance.
- Determine the safety and efficacy of the combined treatments.
- Develop predictive and prognostic biomarkers to better guide treatment decisions.

**Schema**

**Eligibility**

- Confirmed mCRPC with rising PSA and  $>5\text{ng/mL}$
- No prior chemotherapy for mCRPC
- Baseline PSMA SUV max  $\geq 10$  on  $^{68}\text{Ga}$  PSMA PET/CT
- $\geq 2$  high risk features for early failure on enzalutamide

**162 participants**

Median age: 71

Randomised  
1:1

**Enzalutamide**  
160 mg once daily  
until disease progression or unacceptable toxicity

**Enzalutamide**  
160 mg once daily  
+ **Lu-PSMA**  
Adaptive dosing

PSMA / FDG PET    Blood    Tissue biopsy

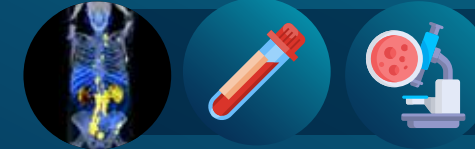

Baseline

PSMA / PET

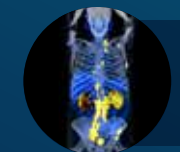

Day 15

PSMA / PET    Blood

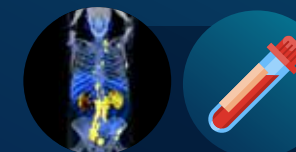

Day 92

PSMA / FDG PET    Blood    Tissue biopsy

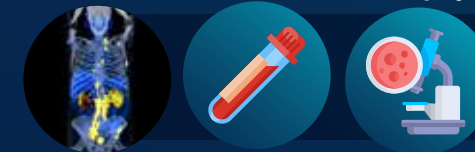

At progression

**SPECT**  
scan  
after each injection

**Lu-PSMA** 7.5 Gbq

**Lu-PSMA** 7.5 Gbq

**2 to 4 doses**  
dependent on  
PSMA / PET

**Lu-PSMA** 7.5 Gbq

**Lu-PSMA** 7.5 Gbq

**Outcomes**

Median follow up: **19 months**

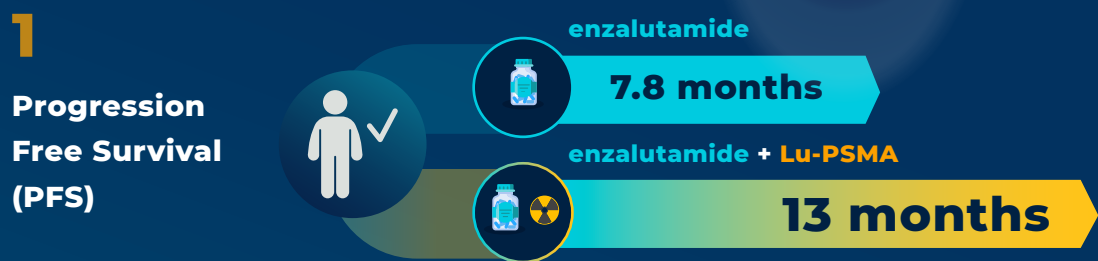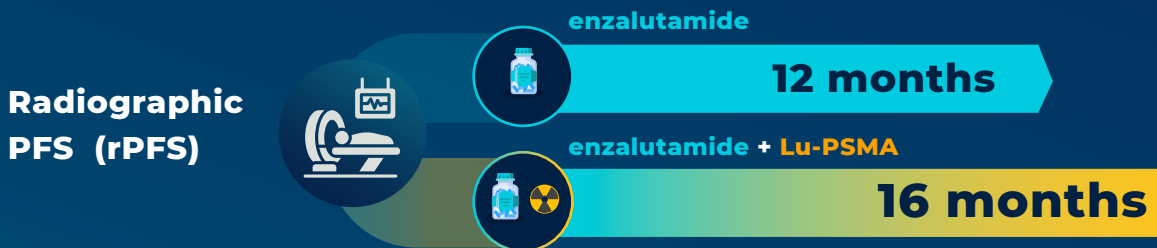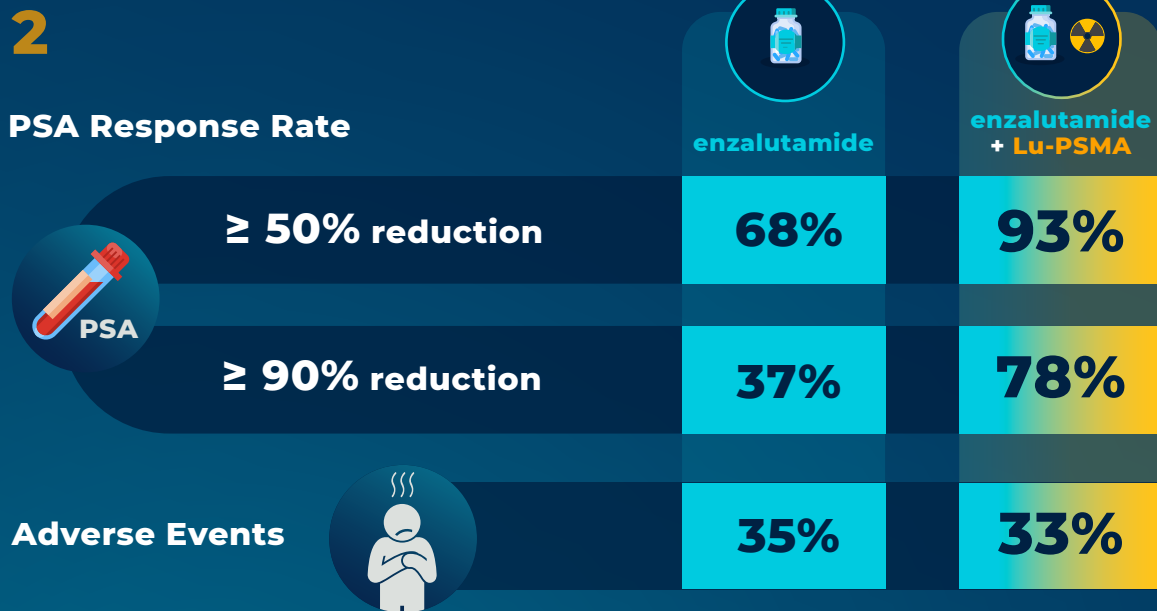

**3** **Translational research**

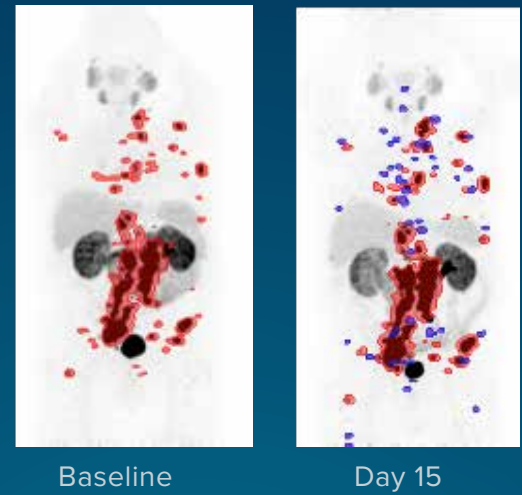

**Prognostic and predictive biomarkers**

Serial quantified molecular imaging with matched timepoint circulating tumor cell and ctDNA analysis will allow comprehensive evaluation of composite biomarkers to develop tools to better guide and personalise treatment decisions.
