# Supplementary figures and images for: Association of early PSMA upregulation with duration of response to enzalutamide with or without [177Lu]Lu-PSMA-617 in poor-risk, metastatic, castration-resistant prostate cancer: Findings from the randomised, phase 2, ENZA-p trial (ANZUP 1901)
Source: Research Square preprint supplement (doi:10.21203/rs.3.rs-6307229/v1), 2025-04-09

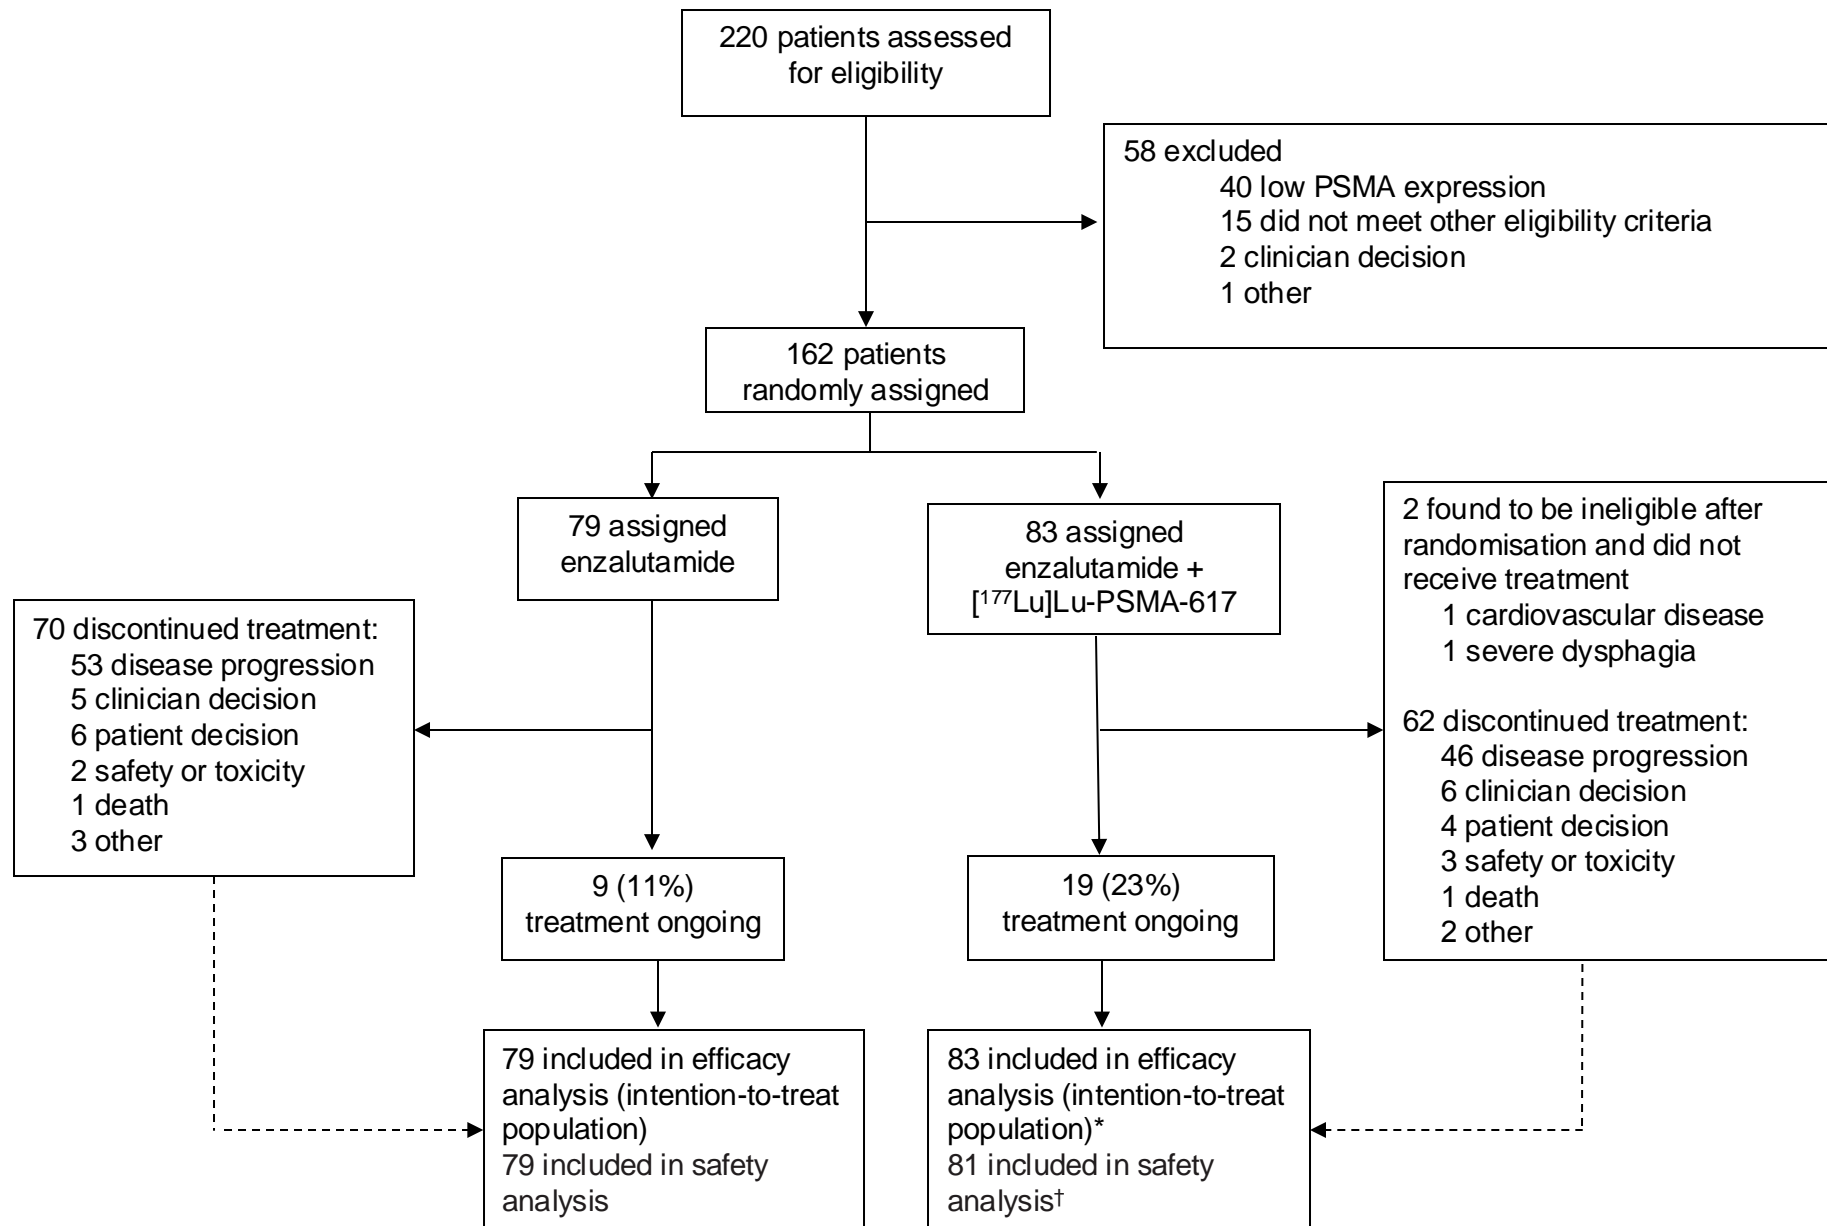

Supplement: Supplementary file 3 [file 9a3305135fa12e5eb430ef8a.pdf]
